# Supplementary material for: The influence of elevated CO 2 and soil depth on rhizosphere activity and nutrient availability in a mature Eucalyptus woodland
Source: Copernicus journal article supplement (doi:10.5194/bg-2022-145), 2022-07-11
Supplement: Supplementary file 1 [file bg-2022-145-supplement.pdf]

1 **S1. Potential enzyme activity method**

2 Potential activity of seven enzymes associated with C, N and P mineralisation were determined for bulk and  
3 rhizosphere soil respectively. For this we used fluorometrically labelled substrates, following the method of Bell  
4 et al., 2013. Two g frozen soil was mixed to a slurry (1:33 w:v) with MilliQ water in a laboratory blender for one  
5 minute. The slurry was pipetted into 96 well plates with three technical replicates and given fluorescent substrates  
6 (4-methylumbelliferone; MUB and 7-amino-4-methylcoumarin: MUC) in accordance with the Bell et al. protocol  
7 (2013). The samples were then incubated at 25 °C for three hours and analysed for fluorescence with a  
8 CLARIOstar plate reader (BMG LABTECH GmbH, Germany). Four enzymes ( $\alpha$ -D-glucopyranoside (AG),  $\beta$ -D-  
9 glucopyranoside (BG),  $\beta$ -D-cellobioside (CB), and  $\beta$ -D-xylopyranoside (XYL)) targeted C-rich compounds  
10 (sugar, cellulose, hemicellulose), two enzymes (L-Leucine-7-aminopeptidase (LAP) and N-acetyl- $\beta$ -D-  
11 glucosamine (NAG)) targeted N-rich compounds (proteins and chitin), and acid phosphatase (PHOS) targeted  
12 organic compounds with P. These enzymes are considered representative of the total enzyme pool active in the  
13 soil.

14 **S2. Enzymatic activity results**

15 Enzyme activities decreased significantly with depth but did not differ significantly between soil or CO<sub>2</sub> treatment  
16 (Table S2.3 and S2.4). One exception to the general trend was CB ( $\beta$ -D-cellobioside) that did not decrease with  
17 depth and was significantly higher in rhizosphere soil compared to bulk soil. Notable is the difference in  
18 magnitude for N targeting and P targeting enzymes where P enzymes were twice as abundant than N. The two  
19 to one pattern was maintained as the enzyme activity declined with soil depth.

21 **Table S1.** Potential enzyme activity and stoichiometry of enzymes targeting C, N and P compounds ( $\mu\text{mol h}^{-1} \text{g}^{-1}$ ) for bulk and rhizosphere soil of a mature Eucalyptus forest  
 22 soil exposed to ambient and elevated  $\text{CO}_2$  for three depths (0 to 10 cm, 10 to 30 cm, transition), with standard error in parenthesis. Four enzymes ( $\alpha$ -D-glucopyranoside (AG),  
 23  $\beta$ -D-glucopyranoside (BG),  $\beta$ -D-cellobioside (CB), and  $\beta$ -D-xylopyranoside (XYL)) targeted C-rich compounds (sugar, cellulose, hemicellulose), two enzymes (L-Leucine-7-  
 24 aminopeptidase (LAP) and N-acetyl- $\beta$ -D-glucosamine (NAG)) targeted N-rich compounds (proteins and chitin), and acid phosphatase (PHOS) targeted organic compounds  
 25 with P.

| Layer                       | Enzyme    |             |            |            |             |             |              | Sum         |             |              | Stoichiometry |           |           | pH        |
|-----------------------------|-----------|-------------|------------|------------|-------------|-------------|--------------|-------------|-------------|--------------|---------------|-----------|-----------|-----------|
|                             | AG        | BG          | CB         | XYL        | LAP         | NAG         | PHOS         | C           | N           | P            | C:N           | C:P       | N:P       |           |
| <b>Bulk Ambient</b>         |           |             |            |            |             |             |              |             |             |              |               |           |           |           |
| <i>0-10</i>                 | 5.3 (1)   | 38.9 (7.9)  | 16.4 (3.3) | 23.5 (5.1) | 33.8 (11.5) | 32.1 (5.3)  | 121.9 (27.3) | 84 (14.1)   | 65.9 (12.5) | 121.9 (27.3) | 1.5 (0.3)     | 0.8 (0.1) | 0.7 (0.2) | 5.8 (0.1) |
| <i>10-30</i>                | 3.5 (1)   | 9.5 (1.7)   | 4.1 (1)    | 6.6 (1.2)  | 16.3 (4.3)  | 10.4 (0.8)  | 47.6 (10.2)  | 23.6 (4)    | 26.8 (4.6)  | 47.6 (10.2)  | 1.2 (0.4)     | 0.8 (0.3) | 0.6 (0)   | 6 (0.1)   |
| <i>transition</i>           | 1.6 (0.6) | 2.5 (1)     | 1.1 (0.4)  | 1.4 (0.5)  | 9.3 (1.8)   | 5.2 (1.4)   | 25 (6.3)     | 6.6 (2.3)   | 14.5 (2.7)  | 25 (6.3)     | 0.7 (0.3)     | 0.3 (0.1) | 0.7 (0.2) | 5.8 (0.1) |
| <b>Bulk Elevated</b>        |           |             |            |            |             |             |              |             |             |              |               |           |           |           |
| <i>0-10</i>                 | 5.3 (1.3) | 35.8 (11.3) | 12.5 (3.9) | 20.9 (6.7) | 23.8 (7.5)  | 31.7 (10.1) | 139.5 (52)   | 74.5 (22.3) | 55.5 (15.4) | 139.5 (52)   | 1.4 (0.2)     | 0.7 (0.2) | 0.5 (0.1) | 5.7 (0.2) |
| <i>10-30</i>                | 5.8 (1.6) | 15.4 (5.7)  | 6.9 (2)    | 11.1 (2.7) | 13.7 (3.3)  | 17 (4)      | 65.9 (18)    | 39.2 (10.5) | 30.7 (5.8)  | 65.9 (18)    | 1.4 (0.3)     | 0.8 (0.3) | 0.6 (0.1) | 5.9 (0.1) |
| <i>transition</i>           | 4.6 (1.3) | 7.3 (1.8)   | 4.7 (1.2)  | 5.2 (1.2)  | 3.4 (1.1)   | 16.1 (9.3)  | 23.6 (5.2)   | 21.7 (4.5)  | 19.5 (10.1) | 23.6 (5.2)   | 2 (0.5)       | 1.1 (0.3) | 0.7 (0.2) | 6.1 (0.2) |
| <b>Rhizosphere Ambient</b>  |           |             |            |            |             |             |              |             |             |              |               |           |           |           |
| <i>0-10</i>                 | 5.2 (1.7) | 52.4 (17.7) | 16.3 (3.1) | 21.8 (6.6) | 33.6 (13.4) | 35.6 (9)    | 119.9 (33.4) | 95.7 (26.8) | 69.2 (14.1) | 119.9 (33.4) | 1.6 (0.4)     | 0.8 (0.1) | 0.7 (0.2) | 5.9 (0.1) |
| <i>10-30</i>                | 5.3 (1.3) | 12.5 (1.4)  | 7.7 (1.6)  | 9.9 (1.3)  | 16.5 (4.4)  | 13.5 (1.8)  | 61.4 (13)    | 35.5 (4.4)  | 30 (4.9)    | 61.4 (13)    | 1.4 (0.3)     | 0.9 (0.3) | 0.5 (0.1) | 5.9 (0.1) |
| <i>transition</i>           | 4.3 (1.6) | 12.3 (6.1)  | 6.5 (3.4)  | 9.4 (4.1)  | 13.3 (2.4)  | 19.7 (10.2) | 56.2 (13.9)  | 32.4 (14.5) | 33 (11.6)   | 56.2 (13.9)  | 1 (0.3)       | 0.5 (0.1) | 0.6 (0.1) | 5.7 (0.1) |
| <b>Rhizosphere Elevated</b> |           |             |            |            |             |             |              |             |             |              |               |           |           |           |

| Layer             | Enzyme       |            |               |               |            |                |              | Sum            |                |              | Stoichiometry |              |           | pH        |
|-------------------|--------------|------------|---------------|---------------|------------|----------------|--------------|----------------|----------------|--------------|---------------|--------------|-----------|-----------|
|                   | AG           | BG         | CB            | XYL           | LAP        | NAG            | PHOS         | C              | N              | P            | C:N           | C:P          | N:P       |           |
| <i>0-10</i>       | 3.9<br>(1.2) | 34.4 (8.1) | 12.4<br>(3.5) | 20.1<br>(4.3) | 25.1 (7.4) | 29.7 (6.9)     | 126.1 (40.6) | 70.8<br>(16.3) | 54.8<br>(12.9) | 126.1 (40.6) | 1.3<br>(0.1)  | 0.7<br>(0.1) | 0.5 (0.1) | 5.7 (0.2) |
| <i>10-30</i>      | 6.6<br>(2.1) | 17.8 (3.2) | 6.8 (1)       | 11.4<br>(1.4) | 16 (2.6)   | 23.9 (4)       | 97.1 (24.6)  | 42.6 (4.3)     | 40 (5.7)       | 97.1 (24.6)  | 1.2<br>(0.2)  | 0.7<br>(0.2) | 0.5 (0.1) | 5.8 (0.1) |
| <i>transition</i> | 4.5<br>(1.3) | 17.2 (3.8) | 10.4<br>(3.5) | 6.3 (1.5)     | 5.4 (1.1)  | 32.1<br>(15.5) | 53.1 (16.8)  | 38.3 (5.2)     | 37.5<br>(15.8) | 53.1 (16.8)  | 1.4<br>(0.3)  | 0.9<br>(0.2) | 0.8 (0.3) | 6 (0.3)   |

27 **Table S2:** Model F statistic and significance levels for potential enzyme activity. Significance of P values are in  
 28 bold and as indicated: \*\*\* indicate P < 0.001; \*\* indicate P < 0.01 and \* indicates P < 0.05.

29

|                             | AG   | BG                  | CB                  | XYL                 | LAP                 | NAG               | PHOS                | sum                |                     |                     | stoichiometry   |                  |      |                    |
|-----------------------------|------|---------------------|---------------------|---------------------|---------------------|-------------------|---------------------|--------------------|---------------------|---------------------|-----------------|------------------|------|--------------------|
|                             |      |                     |                     |                     |                     |                   |                     | C                  | N                   | P                   | C:N             | C:P              | N:P  | pH                 |
| CO <sub>2</sub>             | 0.98 | 0                   | 0.01                | 0.03                | 0.8                 | 1.55              | 0.19                | 0.02               | 0                   | 0.19                | 1.53            | 0.72             | 0.14 | 0.03               |
| depth                       | 1.45 | <b>23.28</b><br>*** | <b>18.44</b><br>*** | <b>22.84</b><br>*** | <b>11.96</b><br>*** | <b>6.37</b><br>** | <b>17.62</b><br>*** | <b>24.2</b><br>*** | <b>14.41</b><br>*** | <b>17.62</b><br>*** | 0.51            | 0.48             | 0.73 | 0.67               |
| soil                        | 0.9  | 2.42                | <b>3.05</b><br>(.)  | 0.83                | 0.22                | 2.59              | 1.48                | 2.43               | 2.03                | 1.48                | 0               | 0                | 0    | 0.17               |
| CO <sub>2</sub> :depth      | 1.25 | 1.77                | <b>2.81</b><br>(.)  | 0.57                | 0.42                | 1.16              | 0.42                | 1.83               | 1.13                | 0.42                | <b>3.3</b><br>* | <b>4.42</b><br>* | 1.03 | <b>2.94</b><br>(.) |
| CO <sub>2</sub> :soil       | 1.01 | 0.38                | 0.15                | 0.43                | 0.01                | 0                 | 0.01                | 0.51               | 0                   | 0.01                | 1.84            | 1.13             | 0.04 | 0.04               |
| depth:soil                  | 1.02 | 0.27                | 1.56                | 0.81                | 0.06                | 1.01              | 0.96                | 0.59               | 0.74                | 0.96                | 0.03            | 0                | 0.05 | 0.38               |
| CO <sub>2</sub> :depth:soil | 0.07 | 0.41                | 0.29                | 0.25                | 0.02                | 0.12              | 0.12                | 0.04               | 0.06                | 0.12                | 0.34            | 0.22             | 0.07 | 0                  |

30
